# Supplementary material
Source: publisher site journal article supplement (https://www.dovepress.com/article/351077)

**Noninvasive imaging evaluation based on computed tomography of the efficacy of initial transarterial chemoembolization to predict outcome in patients with hepatocellular carcinoma**

**Supplementary materials**

**Figure S1.** The result of spearman correlation between these selected features, which showed that all coefficients were less than 0.9.


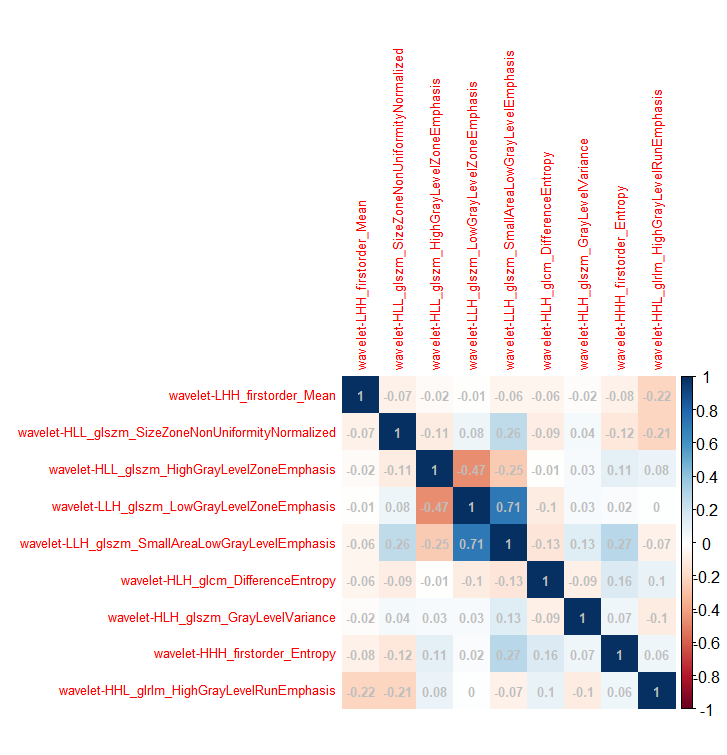


**Figure S2.** The nomogram of radscore (A) and clinical model (B) for predicting overall survival (OS).


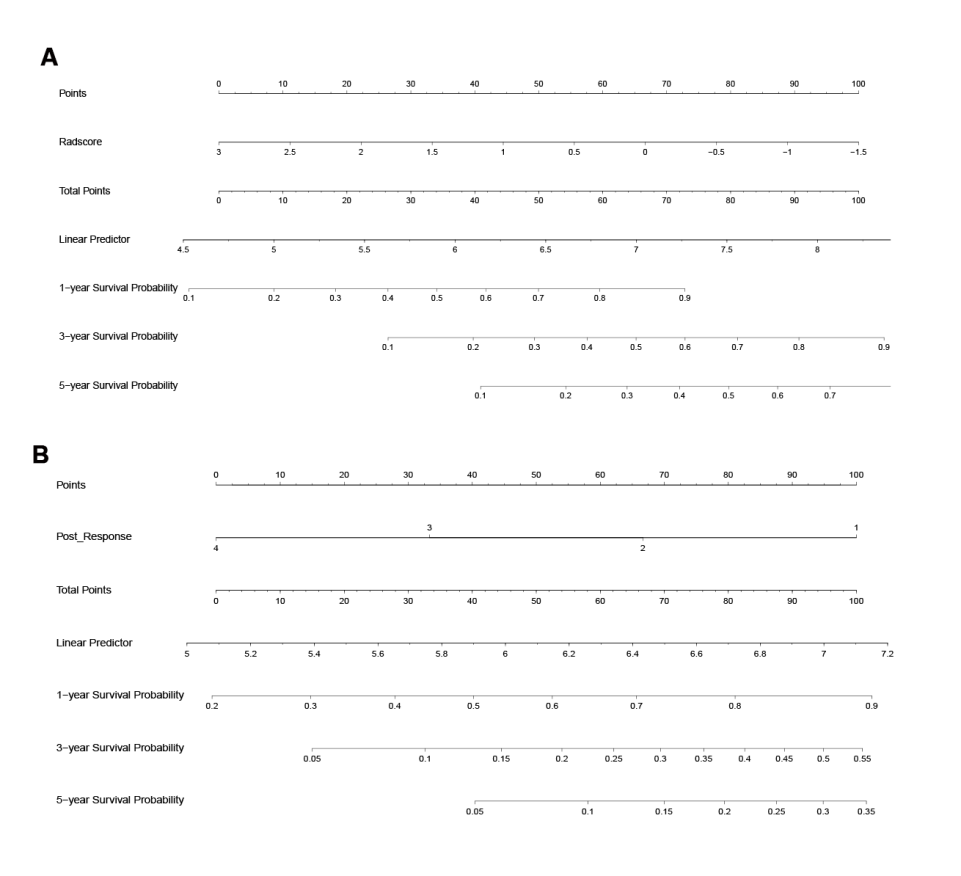


**Figure S3.** The cut-off value (1.36) of radscore by using maximally selected log-rank statistics and classified it as the low-score subgroup and high-score subgroup.


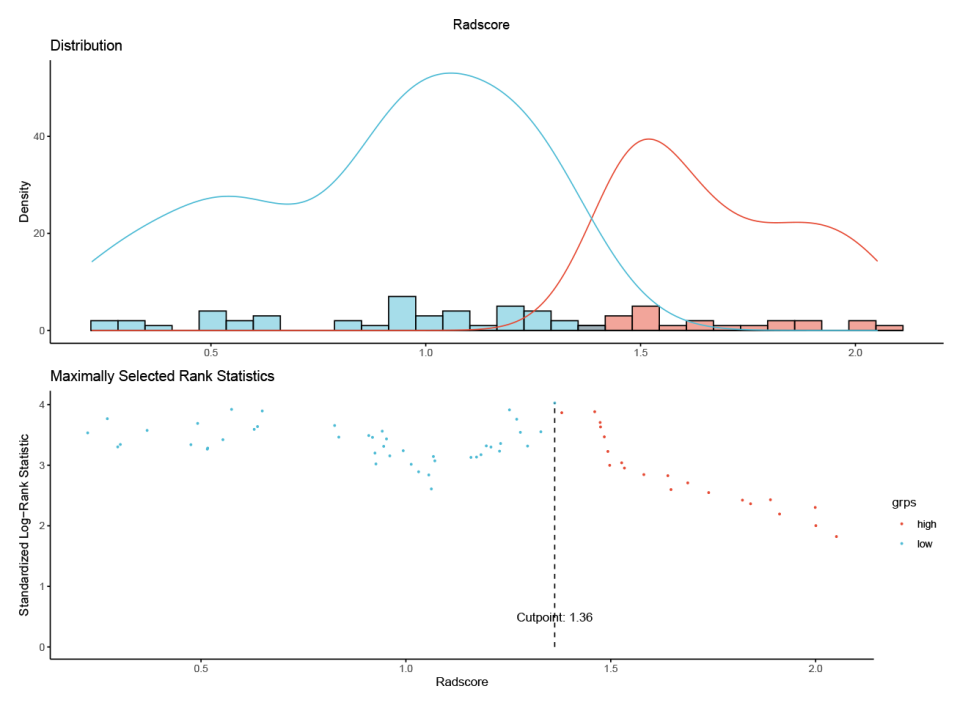

Supplement: Supplementary file 1 [file get_supplementary_file.php]
